# Supplementary material for: Good and Bad News About the (S, T) Policy
Source: Atypon-hosted journal article supplement (doi:10.1287/msom.1110.0353), 2011-10-29
Supplement: msom.1110.0353-sm-good_and_bad_news.pdf [file msom.1110.0353-sm-good_and_bad_news.pdf]

# Online Appendix

## “Good and Bad News about the $(S, T)$ Policy”

Fang Liu

Nanyang Business School, Nanyang Technological University, Singapore, 639798, Liu.Fang@ntu.edu.sg

Jing-Sheng Song

Fuqua School of Business, Duke University, Durham, NC 27708,  
and School of Management, Fudan University, Shanghai 200433, China, jssong@duke.edu

June 12, 2011; Revised July 24, 2011

**Proof of Lemma 1** We only provide the proofs for Brownian Motion and Poisson demand processes. Other cases can be shown similarly.

1) Suppose  $X(t)$  is a Brownian motion. Then the c.d.f. of  $X(t)$  is

$$F(x, t) = N\left(\frac{x - \lambda t}{\sigma\sqrt{t}}\right),$$

where  $N$  is the c.d.f. of the standard Normal distribution.

For any  $x > 0$ ,

$$V(x) = \lim_{t \rightarrow 0^+} F^0(x, t)/t \leq \lim_{t \rightarrow 0^+} \frac{1}{t} \int_{-\infty}^{\frac{-x}{\sigma\sqrt{t}}} \frac{1}{\sqrt{2\pi}} (-y) e^{-\frac{y^2}{2}} dy = \lim_{t \rightarrow 0^+} \frac{1}{t} \frac{1}{\sqrt{2\pi}} e^{-\frac{y^2}{2}} \Big|_{-\infty}^{\frac{-x}{\sigma\sqrt{t}}} = 0.$$

The second inequality follows because  $\frac{-x}{\sigma\sqrt{t}} < -1$  for sufficiently small  $t$ . Note that  $V(x) \geq 0$ , thus we have  $V(x) = 0$ .

Similarly, when  $x < 0$ ,

$$V(x) = \lim_{t \rightarrow 0^+} -(1 - F^0(x, t))/t = \lim_{t \rightarrow 0^+} -N\left(\frac{x - \lambda t}{\sigma\sqrt{t}}\right)/t = 0.$$

When  $x = 0$ ,

$$V(x) = \lim_{t \rightarrow 0^+} F(x, t)/t = \lim_{t \rightarrow 0^+} N\left(\frac{-\lambda\sqrt{t}}{\sigma}\right)/t = \infty.$$

Note that

$$\int_{-\infty}^{\infty} V(x) dx = \lim_{t \rightarrow 0^+} E[X(t)]/t = \lambda,$$

we have  $V(x) = \lambda\delta(x)$ .

2) Suppose  $X(t)$  is a Poisson process. The c.d.f. of  $X(t)$  is  $F(x, t) = \sum_{i=0}^x e^{-\lambda t} (\lambda t)^i / i!$ . For any  $x > 0$ ,

$$V(x) = \lim_{t \rightarrow 0^+} F^0(x, t)/t = \lim_{t \rightarrow 0^+} \sum_{i=x}^{\infty} e^{-\lambda t} \lambda^i t^{i-1} / i! = 0.$$

When  $x = 0$ ,

$$V(x) = \lim_{t \rightarrow 0^+} F^0(x, t)/t = \lim_{t \rightarrow 0^+} \sum_{i=0}^{\infty} e^{-\lambda t} \lambda^i t^{i-1} / i! = \infty.$$

Note that

$$\int_{-\infty}^{\infty} V(x) dx = \lim_{t \rightarrow 0^+} E[X(t)]/t = \lambda,$$

we have  $V(x) = \lambda \delta(x)$ . □

**Proof of Proposition 1** Note that

$$C(S, T) = \frac{K}{T} P(X(T) > 0) + hE[S - Y(T)] + (h + b)E[Y(T) - S]^+$$

consists of three terms. The results of 1) and 2) for the first two terms follow from Rao (2003). Then it is sufficient to show that those results hold for  $H(S, T) = E[Y(T) - S]^+$ .

1) Since  $X(T)$  is SI in  $T$ , according to Shaked and Shanthikumar (2006) Theorem 1.A.6,  $Y(T_1) \geq_{st} Y(T_2)$  for any  $T_1 > T_2 > 0$ . Therefore,  $Y(T)$  is SI in  $T$ . When demand is continuous,

$$\frac{\partial^2}{\partial T \partial S} H(S, T) = \frac{\partial}{\partial T} \Psi(S, T) \leq 0;$$

when demand is discrete,

$$H(S + 1, T_1) + H(S, T_2) - H(S + 1, T_2) - H(S, T_1) = Pr(Y(T_2) > S) - Pr(Y(T_1) > S) \leq 0.$$

Therefore,  $H(S, T)$  is submodular.

2) For any fixed  $T$ ,  $H(S, T)$  is clearly convex in  $S$ . The closed form solution follows directly from convexity property.

3) If  $X(T)$  is SIL in  $T$ , from Theorem 8.A.17. (p. 363) of Shaked and Shanthikumar (2006),  $Y(T)$  is SIL in  $T$ . Thus, for any fixed  $S$ ,  $H(S, T)$  is convex in  $T$ .

Since  $L$  only appears in  $Y(T)$ , the proof is the same for  $L > 0$ . □

**Proof of Proposition 2** For any local minimum  $(x_0, y_0)$  of  $h(x, y)$ , there exists a neighborhood  $\mathcal{N}$  such that for any  $(x, y) \in \mathcal{N}$  we have  $h(x_0, y_0) \leq h(x, y)$ . (Here, if  $h(x, y)$  is defined on  $\mathbb{R}^2$ ,  $\mathcal{N} = B((x_0, y_0), \varepsilon)$  is an  $\varepsilon$ -ball. If  $h(x, y)$  is defined on  $\mathbb{Z}^2$ ,  $\mathcal{N} = \{(x_0 + x, y_0 + y), x = -1, 0, 1, y = -1, 0, 1\}$ .) Fix  $y = y_0$ ,  $h(x, y_0)$  is unimodal in  $x$ . Therefore,  $x_0$  is the minimizer of  $h(x, y_0)$  and

hence  $x^*(y_0) \supseteq x_0$ . Note that  $h(x^*(y_0), y_0)$  is also a local minimum of  $h(x^*(y), y)$ , and  $h(x^*(y), y)$  is unimodal in  $y$ . Thus,  $y_0$  is the global minimum of  $h(x^*(y), y)$ . Note that  $\min_{(x,y)}\{h(x,y)\}$  is equivalent to  $\min_x\{\min_y\{h(x,y)\}\}$ , therefore  $y_0$  being the global minimum is equivalent to  $(x_0, y_0)$  being the global minimum.  $\square$

Before proving Proposition 3, we first need to establish the following lemma.

**Lemma A** For  $i = 0, 1$ ,

$$1) \Psi^i(S, T) = \frac{1}{T} \int_0^T F^i(S, x) dx;$$

$$2) \psi(S, T) = \frac{1}{T} \int_0^T f(S, x) dx;$$

$$3) \frac{\partial}{\partial T} F^0(S, T) = \int_{-\infty}^{\infty} f(x, T) V(S-x) dx \equiv (f * V)(S, T) \geq 0, \text{ where } (f * V) \text{ means convolution of } f \text{ and } V;$$

$$4) \frac{\partial}{\partial T} F^1(S, T) = \lambda F^0(S, T) + \int_{-\infty}^{\infty} f(x, T) \int_{-\infty}^{\infty} |V(S-x+y)| dy dx \equiv \lambda F^0(S, T) + (f * |V|)(S, T) \geq 0;$$

$$5) \frac{\partial}{\partial T} \Psi^i(S, T) = -\frac{1}{T} [\Psi^i(S, T) - F^i(S, T)].$$

If  $L > 0$ , let  $\Psi^i(S, T; L)$  be the counterpart of  $\Psi^i(S, T)$  with positive leadtime, then we modify parts 1) 2) and 5) to:

$$1^*) \Psi^i(S, T; L) = \frac{1}{T} \int_L^{T+L} F^i(S, x) dx;$$

$$2^*) \psi(S, T; L) = \frac{1}{T} \int_L^{T+L} f(S, x) dx;$$

$$5^*) \frac{\partial}{\partial T} \Psi^i(S, T; L) = -\frac{1}{T} [\Psi^i(S, T; L) - F^i(S, T+L)],$$

All the results hold for discrete  $X(T)$  by substituting integration with summation.

**Proof of Lemma A** 1)  $\Psi^0(S, T) = \frac{1}{T} \int_0^T Pr(X(\mathcal{U}[0, T]) > S | \mathcal{U}[0, T] = x) dx = \frac{1}{T} \int_0^T F^0(S, x) dx.$

$$\Psi^1(S, T) = \int_S^{\infty} Pr(Y(T) > x) dx = \frac{1}{T} \int_0^T \int_S^{\infty} Pr(X(\mathcal{U}[0, T]) > x | \mathcal{U}[0, T] = y) dx dy = \frac{1}{T} \int_0^T F^1(S, y) dy.$$

$$2) \psi^0(S, T) = -\frac{\partial}{\partial S} \Psi^0(S, T) = -\frac{\partial}{\partial S} \frac{1}{T} \int_0^T F^0(S, x) dx = \frac{1}{T} \int_0^T f(S, x) dx.$$

3) Note

$$\frac{\partial}{\partial T} F^0(S, T) = \lim_{t \rightarrow 0^+} \frac{Pr(X(T+t) > S) - Pr(X(T) > S)}{t}.$$

Since  $X(T)$  is stationary with independent increments, we have  $X(T+t) =_{st} X(T) + X(t)$  and  $X(T)$  and  $X(t)$  are independent. Therefore, the above limit can be simplified by conditioning on  $X(T)$ , i.e.,

$$Pr(X(T+t) > S) - Pr(X(T) > S) = \int_{-\infty}^S f(x, T) F^0(S-x, t) dx - \int_S^{\infty} f(x, T) (1 - F^0(S-x, t)) dx.$$

Taking the limit over  $t$ , we have  $\frac{\partial}{\partial T} F^0(S, T) = \int_{-\infty}^{\infty} f(x, T) V(S-x) dx = (f * V)(S, T)$ , which is nonnegative because  $X(T)$  is SI.

4) We calculate the derivative of  $F^1(S, T)$  by definition. Note that

$$\begin{aligned} \frac{\partial}{\partial T} F^1(S, T) &= \lim_{t \rightarrow 0^+} \frac{E[X(T+t) - S]^+ - E[X(T) - S]^+}{t} \\ &= \lim_{t \rightarrow 0^+} \frac{E[X(T) + X(t) - S]^+ - E[X(T) - S]^+}{t}. \end{aligned} \quad (1)$$

We discuss the value of equation (1) in two cases:

Case 1: When  $X(T) - S = x > 0$ , equation (1) can be simplified to:

$$\lim_{t \rightarrow 0^+} \frac{E[X(T+t) - S]^+ - E[X(T) - S]^+}{t} = \lambda + \int_{-\infty}^0 |V(y+x)| dy.$$

Case 2: When  $X(T) - S = x \leq 0$ , equation (1) can be simplified to:

$$\lim_{t \rightarrow 0^+} \frac{E[X(T+t) - S]^+ - E[X(T) - S]^+}{t} = \int_0^{\infty} |V(y+x)| dy.$$

Combining both cases and taking expectation over  $X(T) - S$  yields

$$\frac{\partial}{\partial T} F^1(S, T) = \lambda F^0(S, T) + \int_{-\infty}^{\infty} f(x, T) \int_{-\infty}^{\infty} |V(S-x+y)| dy dx \equiv (f * \int |V|)(S, T) \geq 0.$$

5) Follows directly from 1).

The proofs for 1\*), 2\*) and 5\*) are similar. □

**Proof of Proposition 3** a) From Proposition 1 part 2) and Lemma A parts 2) and 5), we have

$$S^{*'}(T) = \frac{F^0(S^*(T), T) - \Psi^0(S^*(T), T)}{\int_0^T f(S^*(T), x) dx}.$$

From the Lemma A part 1) and taking integration by parts, we obtain

$$\Psi^0(S^*(T), T) = F^0(S^*(T), T) - \frac{1}{T} \int_0^T x \frac{\partial}{\partial x} F^0(S^*(T), x) dx.$$

Substituting  $F^0$  in the first expression by that in the second expression yields the result.

When  $L > 0$ , following the same steps we have:

$$S^{*'}(T) = \frac{\int_L^{T+L} x \frac{\partial}{\partial x} F^0(S^*(T), x) dx}{\int_L^{T+L} f(S^*(T), x) dx}.$$

b) To prove unimodality, we need to show  $\partial C(S^*(T), T)/\partial T$  changes sign only once. Because  $X(T)$  is continuous,  $F^0(0, T) = 1$  for all  $T > 0$ , so the cost function becomes

$$C(S, T) = \frac{K}{T} + h(S - \lambda T/2) + (h + b)\Psi^1(S, T).$$

Substitute  $S^*(T)$  into  $C(S, T)$  and take derivative over  $T$ , we have:

$$\frac{\partial}{\partial T} C(S^*(T), T) = \frac{1}{T^2} A(T),$$

where

$$A(T) = -K - \frac{\lambda h}{2} T^2 + (h + b) \int_{S^*(T)}^{\infty} \left( T F^0(y, T) - \int_0^T F^0(y, x) dx \right) dy.$$

Thus, it is sufficient to show that  $A(T)$  is increasing in  $T$ . Taking derivative over  $T$ , we have

$$\begin{aligned} A'(T) &= -\lambda h T + (h + b) \int_{S^*(T)}^{\infty} \left( F^0(y, T) + T \frac{\partial}{\partial T} F^0(y, T) - F^0(y, T) \right) dy \\ &\quad - (h + b) \left( T F^0(S^*(T), T) - \int_0^T F^0(S^*(T), x) dx \right) S^{*'}(T). \end{aligned}$$

Note that  $S^*(T)$  satisfies

$$\Psi^0(S^*(T), T) = \frac{1}{T} \int_0^T F^0(S^*(T), x) dx = h/(h + b). \quad (2)$$

Therefore

$$\begin{aligned} A'(T) &= -\lambda h T + (h + b) \int_{S^*(T)}^{\infty} T \frac{\partial}{\partial T} F^0(y, T) dy - (h + b) (T F^0(S^*(T), T) - h T / (h + b)) S^{*'}(T) \\ &= h T (S^{*'}(T) - \lambda) + (h + b) T \left[ \int_{S^*(T)}^{\infty} \frac{\partial}{\partial T} F^0(y, T) dy - F^0(S^*(T), T) S^{*'}(T) \right]. \end{aligned}$$

From Lemma A part 4)

$$\int_{S^*(T)}^{\infty} \frac{\partial}{\partial T} F^0(y, T) dy = \frac{\partial}{\partial T} E[X(T) - S]^+ |_{S=S^*(T)} = \lambda F^0(S^*(T), T) + (f * \int |V|)(S^*(T), T),$$

where  $(f * \int |V|)(S^*(T), T) \geq 0$ . Thus,

$$A'(T) = (h + b)T(\lambda - S^{*'}(T))(F^0(S^*(T), T) - h/(h + b)) + (h + b)T(f * \int |V|)(S^*(T), T).$$

Because  $F^0(S^*(T), x)$  is increasing in  $x$  and from equation (2), we have

$$F^0(S^*(T), T) - h/(h + b) \geq 0.$$

From the assumption  $\lambda \geq S^{*'}(T)$ , we have  $A'(T) \geq 0$ , which proves the statement.

c) In particular, when  $V(x) = \lambda \delta(x)$ , substitute it into  $S^{*'}(T)$  we have:

$$S^{*'}(T) \leq \lambda \int_0^T T f(S^*(T), x) dx / \left( T \int_0^T f(S^*(T), x) dx \right) = \lambda,$$

where the second equality follows from Lemma A part 3). Therefore,  $S^{*'}(T) \leq \lambda$  holds and hence the statement is true.

Following the same steps, the statements are true for  $L > 0$ . □

**Proof of Proposition 5** 1) From Proposition 1 part 1)  $C(S, T)$  is submodular in  $(S, T)$ , therefore  $T_m(S)$  and  $S^*(T)$  are increasing functions of  $S$  and  $T$ , respectively. By the construction of  $T_m(S)$ , we know that  $S^*(T) = S$  in  $[T_m(S - 1), T_m(S))$ . The points that make  $S^*(T)$  discontinuous are  $T_m(S)$ . By definition of  $T_m(S)$ , the increment of  $S^*(T)$  at  $T_m(S)$  is one.

2) From Proposition 1 part 2) we know that  $S^*(T)$  is piecewise constant in  $T$ . Therefore, in any interval that  $S^*(T)$  is constant following Proposition 1 part 3),  $C(S^*(T), T)$  is convex in  $T$ .

3) Suppose this is not true. If  $C(S, T_m(S)) < C(S + 1, T_m(S))$ , then because both  $C(S, T)$  and  $C(S + 1, T)$  are continuous in  $T$ , for sufficiently small  $\Delta > 0$ , we must have  $C(S, T_m(S) + \Delta) < C(S + 1, T_m(S) + \Delta)$ , contradicting to  $S^*(T_m(S) + \Delta) = S + 1$ . If  $C(S, T_m(S)) > C(S + 1, T_m(S))$ , then it contradicts  $S^*(T_m(S)) = S$ . Therefore, we must have  $C(S, T_m(S)) = C(S + 1, T_m(S))$ .

4) Using property 3), the right directive satisfies:

$$\frac{\partial}{\partial T} C(S^*(T), T) \Big|_{T_m(S)-} = \frac{\partial}{\partial T} C(S, T) \Big|_{T_m(S)}.$$

$$\begin{aligned}
\left. \frac{\partial}{\partial T} C(S^*(T), T) \right|_{T_m(S)+} &= \lim_{\Delta \rightarrow 0} \frac{C(S^*(T_m(S) + \Delta), T_m(S) + \Delta) - C(S^*(T_m(S)), T_m(S))}{\Delta} \\
&= \lim_{\Delta \rightarrow 0} \frac{C(S + 1, T_m(S) + \Delta) - C(S + 1, T_m(S))}{\Delta} \\
&= \left. \frac{\partial}{\partial T} C(S + 1, T) \right|_{T_m(S)}.
\end{aligned}$$

The left directive satisfies:

$$\begin{aligned}
\left. \frac{\partial}{\partial T} C(S^*(T), T) \right|_{T_m(S)-} &= \lim_{\Delta \rightarrow 0} \frac{C(S^*(T_m(S)), T_m(S)) - C(S^*(T_m(S) - \Delta), T_m(S) - \Delta)}{\Delta} \\
&= \lim_{\Delta \rightarrow 0} \frac{C(S, T_m(S)) - C(S, T_m(S) - \Delta)}{\Delta} \\
&= \left. \frac{\partial}{\partial T} C(S, T) \right|_{T_m(S)}.
\end{aligned}$$

The last equality in both equations follow because fix  $S$ ,  $C(S, T)$  is differentiable at  $T$ .

5)

$$\begin{aligned}
&\left. \frac{\partial}{\partial T} C(S^*(T), T) \right|_{T_m(S)-} - \left. \frac{\partial}{\partial T} C(S^*(T), T) \right|_{T_m(S)+} = \left. \frac{\partial}{\partial T} C(S + 1, T) \right|_{T_m(S)} - \left. \frac{\partial}{\partial T} C(S, T) \right|_{T_m(S)} \\
&= \frac{h + b}{T_m(S)} [F^1(S - 1, T_m(S)) - \Psi^1(S - 1, T_m(S)) - F^1(S, T_m(S)) + \Psi^1(S, T_m(S))].
\end{aligned}$$

Note that  $\Psi^1(S - 1, T_m(S)) - \Psi^1(S, T_m(S)) = \Psi^0(S, T_m(S)) = h/(h + b)$  and  $F^1(S - 1, T_m(S)) - F^1(S, T_m(S)) = F^0(S, T_m(S))$ . The above equation can be further simplified to

$$\left. \frac{\partial}{\partial T} C(S^*(T), T) \right|_{T_m(S)-} - \left. \frac{\partial}{\partial T} C(S^*(T), T) \right|_{T_m(S)+} = \frac{h + b}{T_m(S)} \left[ F^0(S, T_m(S)) - \frac{h}{h + b} \right].$$

Since  $0 \geq F^0(S, T_m(S)) \leq 1$ ,  $F^0(S, T_m(S)) - \frac{h}{h+b}$  is bounded for all  $T_m(S)$ . Therefore,

$$\left. \frac{\partial}{\partial T} C(S^*(T), T) \right|_{T_m(S)-} - \left. \frac{\partial}{\partial T} C(S^*(T), T) \right|_{T_m(S)+} = O\left(\frac{1}{T_m(S)}\right).$$

□

The following definitions and lemma are useful for proving Proposition 6. Assume  $\{X(t), t \geq 0\}$  is Poisson with rate  $\lambda$ . Thus,  $Y(T) = X[\mathcal{U}[0, T]]$  and  $X(T) \sim \text{Poisson}(\lambda T)$ . Let  $g(\cdot, T)$  be the pmf of  $X(T)$  and  $p(\cdot, T)$  the pmf of  $Y(T)$ . Define

$$\begin{aligned}
G^0(S, T) &= \sum_{u=S+1}^{\infty} g(u, T), & G^i(S, T) &= \sum_{u=S+1}^{\infty} G^{i-1}(u, T), \quad i = 1, 2. \\
P^0(S, T) &= \sum_{u=S+1}^{\infty} p(u, T), & P^i(S, T) &= \sum_{u=S+1}^{\infty} P^{i-1}(u, T), \quad i = 1, 2.
\end{aligned}$$

Then

$$C(S, T) = \frac{K}{T}G^0(0, T) + h[S - P^1(-1, T)] + (h + b)P^1(S - 1, T). \quad (3)$$

For any discrete function  $\varphi(x)$ , let  $\Delta_x\varphi(x) = \varphi(x+1) - \varphi(x)$ . The following lemma is a counterpart of Lemma A under Poisson demand. (Similar properties of  $G(S, T)$  in Lemma B can be found in Hadley and Whitin 1963.)

**Lemma B** For  $i = 1, 2$ ,

$$1) \frac{\partial}{\partial T}P^i(S, T) = \frac{1}{T}[G^i(S, T) - P^i(S, T)];$$

$$2) \frac{\partial}{\partial T}G^0(S, T) = \lambda g(S, T) \quad \text{and} \quad \frac{\partial}{\partial T}G^1(S, T) = \lambda G^0(S - 1, T);$$

$$3) p(S, T) = \frac{1}{\lambda T}G^0(S, T) \quad \text{and} \quad P^{i-1}(S, T) = \frac{1}{\lambda T}G^i(S, T);$$

$$4) \Delta_S P^i(S, T) = P^{i-1}(S + 1, T) \quad \text{and} \quad \Delta_S G^i(S, T) = G^{i-1}(S + 1, T);$$

$$5) \Delta_S P^0(S, T) = p(S + 1, T) \quad \text{and} \quad \Delta_S G^0(S, T) = g(S + 1, T);$$

6) both  $G^1$  and  $P^1$  can be expressed as summations of  $g$ :

$$G^1(S, T) = \sum_{u=S+1}^{\infty} (u - S - 1)g(u, T),$$

$$P^1(S, T) = \frac{1}{2\lambda T} \sum_{u=S+3}^{\infty} (u^2 - 3u - (S - 1)(S + 2))g(u, T).$$

When  $L > 0$ , let  $P^i(S, T; L)$  be the corresponding  $P^i(s, T)$ , we modify the above results to:

$$1^*) \frac{\partial}{\partial T}P^i(S, T; L) = \frac{1}{T}[G^i(S, T + L) - P^i(S, T; L)];$$

$$3^*) p(S, T) = \frac{1}{\lambda T}[G^0(S, T + L) - G^0(S, L)] \quad \text{and} \quad P^{i-1}(S, T; L) = \frac{1}{\lambda T}[G^i(S, T + L) - G^i(S, L)];$$

$$4^*) \Delta_S P^i(S, T; L) = P^{i-1}(S + 1, T; L);$$

$$5^*) \Delta_S P^0(S, T; L) = p(S + 1, T; L);$$

6\*)

$$P^1(S, T; L) = \frac{1}{2\lambda T} \sum_{u=S+3}^{\infty} (u^2 - 3u - (S-1)(S+2))[g(u, T+L) - g(u, L)].$$

**Proof of Lemma B** 1) Note that

$$P^0(S, T) = \sum_{u=S+1}^{\infty} p(u, T) = \frac{1}{T} \int_0^T \sum_{u=S+1}^{\infty} e^{-\lambda t} \frac{(\lambda t)^u}{u!} dt = \frac{1}{T} \int_0^T G^0(S, t) dt.$$

Taking derivatives over  $T$  on both sides yields

$$\frac{\partial}{\partial T} P^0(S, T) = \frac{\partial}{\partial T} \left[ \frac{1}{T} \int_0^T G^0(S, t) dt \right] = \frac{1}{T^2} \left[ G^0(S, T)T - \int_0^T G^0(S, t) dt \right] = \frac{1}{T} [G^0(S, T) - P^0(S, T)].$$

We can calculate  $\frac{\partial}{\partial T} P^1(S, T)$  through  $\frac{\partial}{\partial T} P^0(S, T)$ :

$$\frac{\partial}{\partial T} P^1(S, T) = \sum_{u=S+1}^{\infty} \frac{\partial}{\partial T} P^0(u, T) = \sum_{u=S+1}^{\infty} \frac{1}{T} [G^0(S, T) - P^0(S, T)] = \frac{1}{T} [G^1(S, T) - P^1(S, T)].$$

2) Follows directly from Lemma 1 and Lemma A.

3) First we show a recursion for  $p(S, T)$ .

$$p(S, T) = \frac{1}{T} \int_0^T e^{-\lambda t} \frac{(\lambda t)^S}{S!} dt = -\frac{1}{\lambda T} g(S, T) + p(S-1, T).$$

and  $p(0, T) = (1 - e^{-\lambda T})/(\lambda T)$ . Therefore, we can calculate  $p(S, T)$  recursively.

$$p(S, T) = -\sum_{u=1}^S \frac{1}{\lambda T} g(u, T) + p(0, T) = \frac{1}{\lambda T} \left[ 1 - \sum_{u=0}^S g(u, T) \right] = \frac{1}{\lambda T} G^0(S, T)$$

$$P^0(S, T) = \sum_{u=S+1}^{\infty} p(u, T) = \sum_{u=S+1}^{\infty} \frac{1}{\lambda T} G^0(u, T) = \frac{1}{\lambda T} G^1(S, T).$$

$$P^1(S, T) = \sum_{u=S+1}^{\infty} P^0(u, T) = \sum_{u=S+1}^{\infty} \frac{1}{\lambda T} G^1(u, T) = \frac{1}{\lambda T} G^2(S, T).$$

4) 5) see Hadley and Whitin 1963.

6)

$$G^1(S, T) = \sum_{u=S+1}^{\infty} G^0(u, T) = \sum_{u=S+1}^{\infty} (u - S - 1)g(u, T),$$

$$\begin{aligned} P^1(S, T) &= \frac{1}{\lambda T} \sum_{u=S+1}^{\infty} G^1(u, T) = \frac{1}{2\lambda T} \sum_{u=S+2}^{\infty} (u^2 - (2S+3)u - (S+1)(S+2))g(u, T) \\ &= \frac{1}{2\lambda T} \sum_{u=S+3}^{\infty} (u^2 - 3u - (S-1)(S+2))g(u, T). \end{aligned}$$

The proofs for 1\*), 3\*), 4\*), 5\*) and 6\*) are similar.  $\square$

**Proof of Proposition 6** For simplicity, let  $\tau = T_m(S)$ . With Poisson demand, we have

$$\begin{aligned} \left. \frac{\partial}{\partial T} C(S^*(T), T) \right|_{\tau+} &= \left. \frac{\partial}{\partial T} C(S+1, T) \right|_{\tau+} \\ &= \frac{1}{\tau} K \lambda e^{-\lambda\tau} - K \frac{1 - e^{-\lambda\tau}}{(T_m(S))^2} - \frac{h\lambda}{2} + \frac{h+b}{\tau} [G^1(S, \tau) - P^1(S, \tau)]. \end{aligned}$$

Note that  $P^0(S, \tau) = \frac{1}{\lambda\tau} G^1(S, \tau) = \frac{h}{h+b}$ . Substitute this into the above equation and apply Lemma B leads to

$$\begin{aligned} &\left. \frac{\partial}{\partial T} C(S^*(T), T) \right|_{\tau+} \\ &= \frac{h+b}{\tau} \left( K \frac{\tau \lambda e^{-\lambda\tau} - 1 + e^{-\lambda\tau}}{\tau(h+b)} - \frac{h\lambda\tau}{2(h+b)} + \frac{h(S+1)}{h+b} + \frac{(S+1)(2S+3)}{\lambda\tau} \sum_{u=S+2}^{\infty} g(u, \tau) \right). \end{aligned}$$

Note that when  $S \rightarrow \infty$ , by definition of  $T_m(S)$ ,  $T_m(S) \rightarrow \infty$ . By the Central Limit Theorem,  $S \approx \lambda\tau + z\sqrt{\lambda\tau}$ , where  $z$  is the critical fractile of the standard normal distribution at  $b/(h+b)$ .

Taking the limit of each term, we have

$$\begin{aligned} \lim_{S \rightarrow \infty} K \frac{\tau \lambda e^{-\lambda\tau} - 1 + e^{-\lambda\tau}}{\tau(h+b)} &= 0, \\ \lim_{S \rightarrow \infty} -\frac{h\lambda\tau}{2(h+b)} + \frac{h(S+1)}{h+b} &= \infty, \\ \lim_{S \rightarrow \infty} \frac{(S+1)(2S+3)}{\lambda\tau} \sum_{u=S+2}^{\infty} g(u, \tau) &\geq 0. \end{aligned}$$

Observe that the only term that is not bounded is  $-\frac{h\lambda\tau}{2(h+b)} + \frac{h(S+1)}{h+b}$ . When  $S$  is sufficiently large, this term is positive. Therefore, we can find  $S$  large enough so that  $\frac{\partial}{\partial T} C(S^*(\tau), \tau) > 0$ . Thus,  $C(S^*(T), T)$  has a finite number of local minima. Following the same steps, similar results can be shown when  $L > 0$ .  $\square$

**Proof of Proposition 7** a) Let  $X_d(T) = \lambda T$  and  $Y_d(T) = X_d[\mathcal{U}[0, T]] = \mathcal{U}[0, \lambda T]$ . Then  $X_d(T)$  and  $Y_d(T)$  are SIL in  $T$ . Further define  $C_d(S, T)$  be the system cost function under  $X_d(T)$  and  $Y_d(T)$ :

$$C_d(S, T) = \frac{K}{T} + h(S - \lambda T/2) + (h+b)E[U[0, \lambda T] - S]^+.$$

Let  $S_d^*(T)$  be the optimal  $S$  that minimizes  $C_d(S, T)$ , then  $S_d^*(T) = \frac{b}{h+b}\lambda T$ . Substitute  $S_d^*(T) = \frac{b}{h+b}\lambda T$  into  $C_d(S, T)$ , we have the cost function optimized over  $S$ :

$$\min_S \{C_d(S, T)\} = C_d(S_d^*(T), T) = \frac{hb}{2(h+b)}\lambda T + K/T.$$

Note that, for any  $T$ ,  $X_d(T) \leq_{cx} X(T)$ . From Theorem 3.A.12 (p. 358) of Shaked and Shanthikumar (2006), this implies  $Y_d(T) \leq_{cx} Y(T)$ . Since  $[T - S]^+$  is convex in  $T$ , using the convex order property, we have for any  $(S, T)$

$$C_d(S, T) - \frac{K}{T} \leq C(S, T) - K \frac{\Pr(X(T) > 0)}{T}.$$

Therefore,

$$\min_S \{C_d(S, T) - \frac{K}{T}\} \leq \min_S \{C(S, T) - K \frac{\Pr(X(T) > 0)}{T}\}.$$

$K \frac{\Pr(X(T) > 0)}{T}$  will not affect the value of  $S^*(T)$ , adding it to both sides of the inequality we have

$$C(S^*(T), T) \geq \frac{hb}{2(h+b)} \lambda T + K \frac{\Pr(X(T) > 0)}{T}.$$

b) Note that  $LB(T) - K \frac{\Pr(X(T) > 0)}{T}$  is linear and increasing in  $T$ . For any  $T > \bar{T}$ , we have

$$C(S^*(T), T) > LB(T) - K \frac{\Pr(X(T) > 0)}{T} > LB(\bar{T}) - K \frac{\Pr(X(\bar{T}) > 0)}{\bar{T}} = C(S_0, T_0).$$

Note that  $S_0 = S^*(T_0)$ , therefore  $C(S^*(T), T) > C(S^*(T_0), T_0)$ , implying  $T$  is not the global minimum. The upper bound for  $S$  follows from the submodularity property of  $C(S, T)$ .

When  $L > 0$ , the corresponding lower bound

$$C_d(S_d^*(T), T, L) = \frac{3hb}{2(h+b)} \lambda T + h\lambda L + K/T$$

can be obtained following the same steps as  $L = 0$ . □
